# Supplementary material
Source: Copernicus journal article supplement (doi:10.5194/egusphere-2026-3148)
Supplement: Supplementary file 1 [file egusphere-2026-3148-supplement.pdf]

**Supporting Information for “Spatial patterns in phytoplankton community composition and their influence on carbon export on the northwest Weddell Sea continental shelf”**

Meredith G. Meyer<sup>1</sup>, Robert J. W. Brewin<sup>2</sup>, Xuerong Sun<sup>2</sup>, Clara Manno<sup>3</sup>, Florence Atherden<sup>3</sup>, Sasha J. Kramer<sup>4</sup>, Giorgio Dall’Olmo<sup>5</sup>, and Karen J. Heywood<sup>1</sup>

<sup>1</sup>Centre for Ocean and Atmospheric Sciences, School of Environmental Sciences, University of East Anglia, Norwich, UK

<sup>2</sup>Centre for Geography and Environmental Science, Department of Earth and Environmental Sciences, University of Exeter, Penryn, UK

<sup>3</sup>British Antarctic Survey, Cambridge, UK

<sup>4</sup>Department of Earth & Environment, Boston University, Boston, MA, USA

<sup>5</sup>Istituto Nazionale di Oceanografia e di Geofisica Sperimentale, Trieste, Italy

**Contents of this file**

1. Table S1
2. Figures S1 – S4

**3. Table S1.** Key phytoplankton accessory pigments and their likelihood to be present in phytoplankton groups. Adapted from Meyer et al. (2024).

|                      | Fuco | Perid | 19-But<br>Fuco | 19-Hex<br>Fuco | Allo | Chl b | Zea |
|----------------------|------|-------|----------------|----------------|------|-------|-----|
| Diatoms              |      |       |                |                |      |       |     |
| Dinoflagellates      |      |       |                |                |      |       |     |
| Haptophytes          |      |       |                |                |      |       |     |
| Cryptophytes         |      |       |                |                |      |       |     |
| Prasinophytes        |      |       |                |                |      |       |     |
| Chlorophytes         |      |       |                |                |      |       |     |
| <i>Synechococcus</i> |      |       |                |                |      |       |     |

|  |                |
|--|----------------|
|  | Unique         |
|  | Always present |
|  | Often present  |
|  | Rarely present |
|  | Trace          |
|  | Not present    |

4. Figures S1 – S4

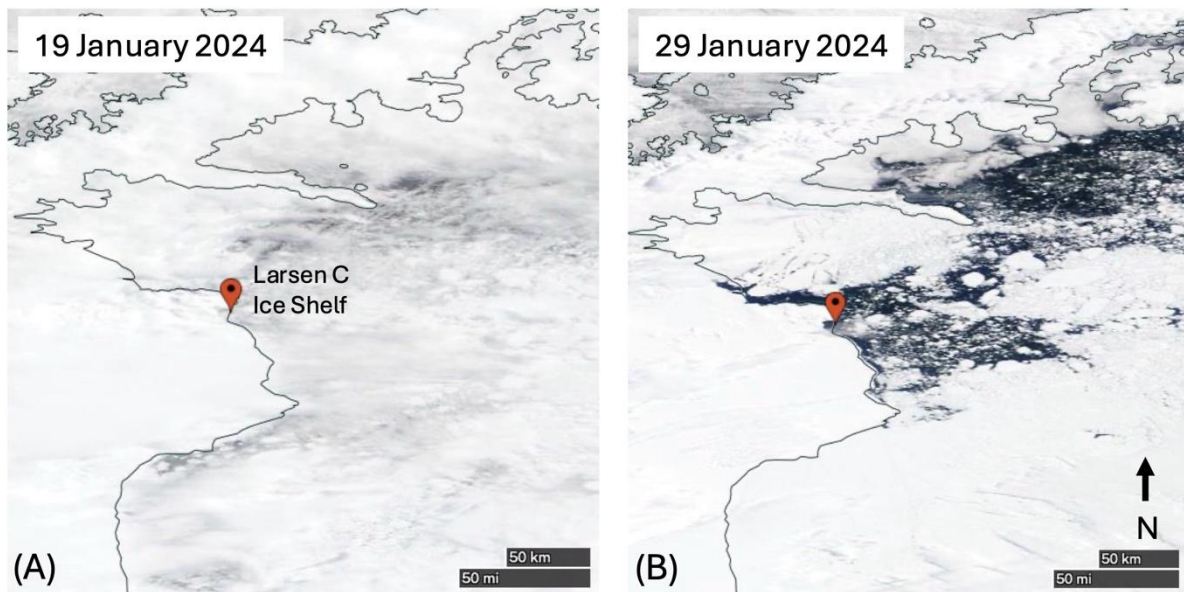

**Figure S1.** Sea ice change from 19 January to 29 January 2024 in the Larsen C sampling region (red flag). Data from NASA Worldview (accessed 17 March 2026).

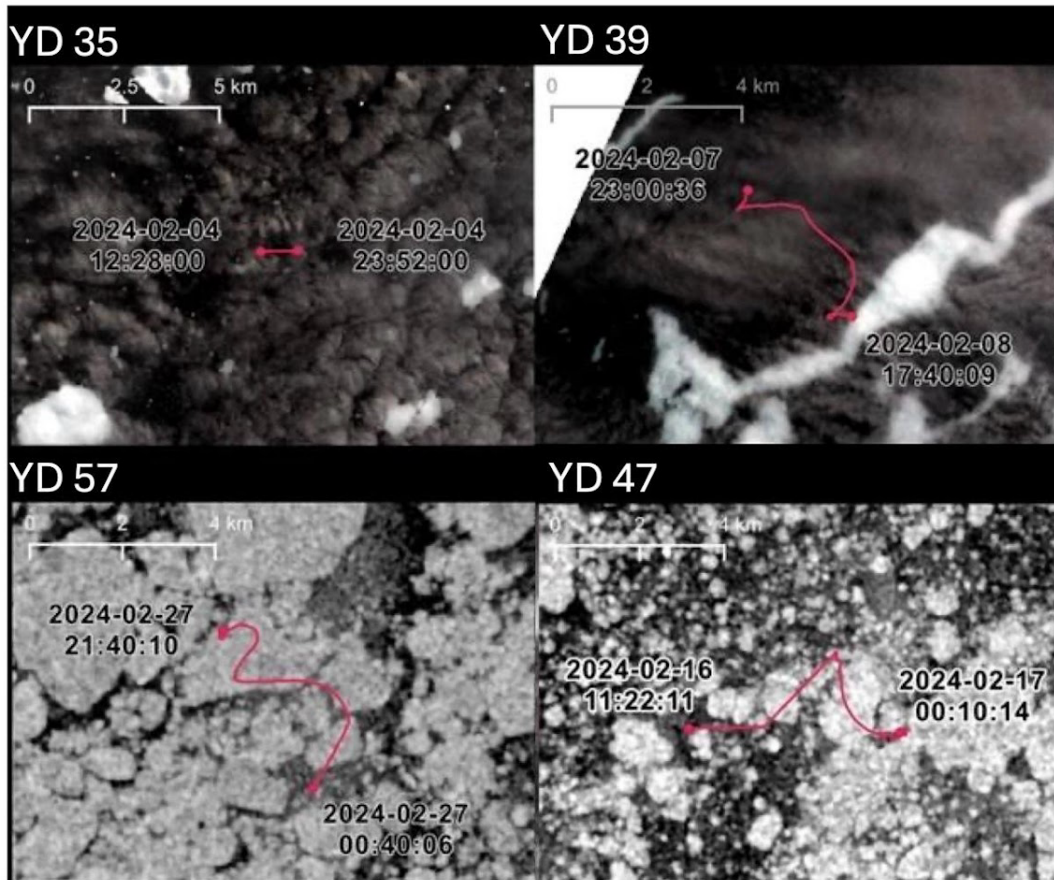

**Figure S2.** Paths (in pink) of the drifting sediment traps by yearday (YD) of trap recovery. Adapted from Atherden et al. (submitted).

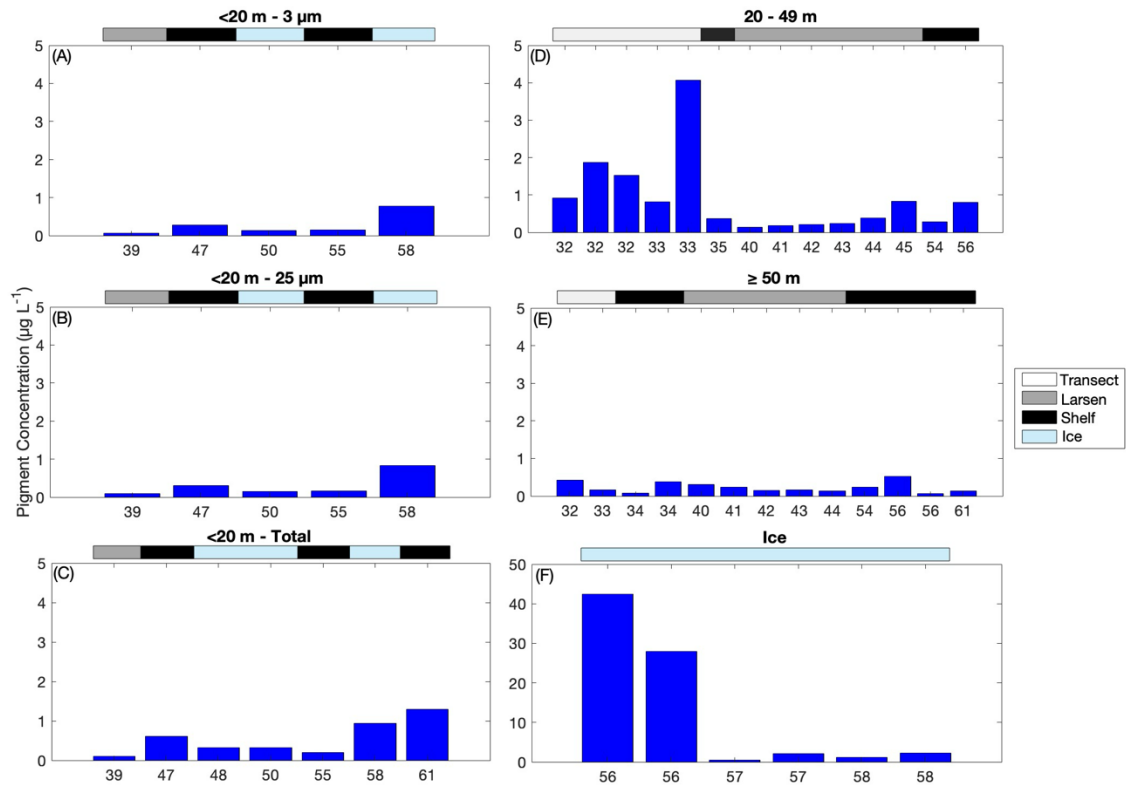

**Figure S3.** Total accessory pigment concentrations ( $\mu\text{g L}^{-1}$ ; C, D) from HPLC analysis for all samples by depth and Yearday. Samples collected from  $<20$  m were size fractionated, producing 3 (A), 25 (B), and total (C) concentrations. All other samples (D-F) were whole seawater (total) samples. Sea ice samples are shown separately to accommodate higher overall concentrations.

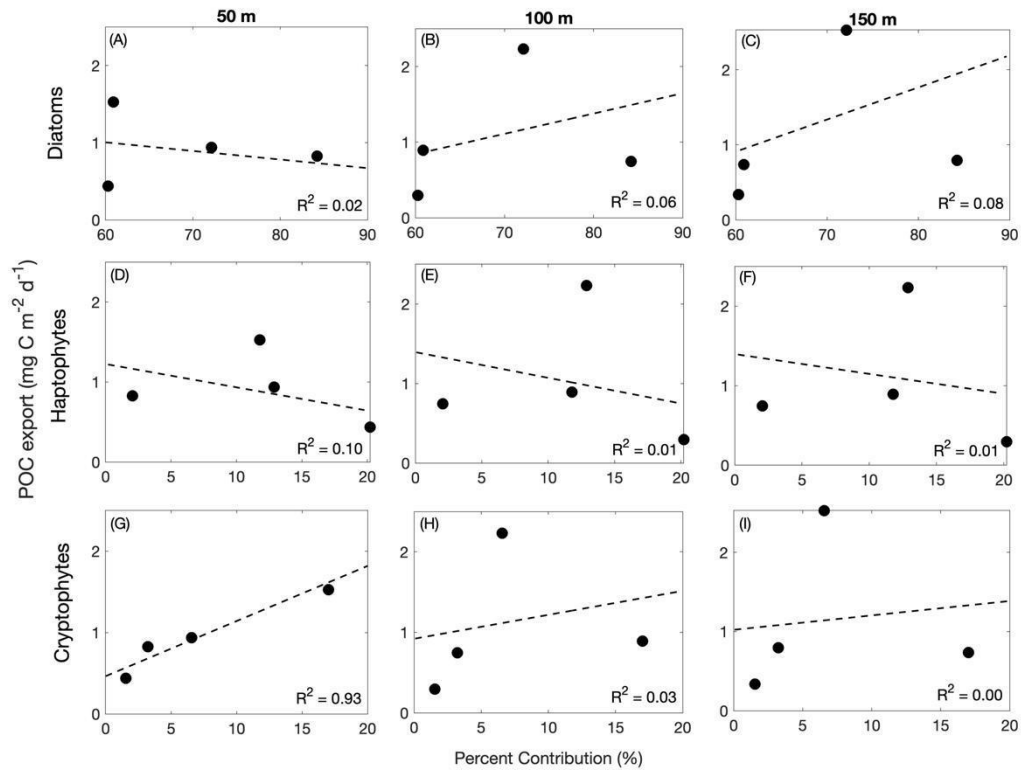

**Figure S4.** POC export ( $\text{mg C m}^{-2} \text{d}^{-1}$ ) versus the percent contribution (%) of diatoms (A-C), haptophytes (D-F), and cryptophytes (G-I) at 50 (A, D, G), 100 (B, E, H), and 150 m (C, F, I). Percent contributions are assessed via the *phytclass* function (Hayward et al., 2023).  $R^2$  values are indicated.
